# Supplementary material for: Endurance exercise training-responsive miR-19b-3p improves skeletal muscle glucose metabolism
Source: PubMed Central journal article supplement (PMC8511155; doi:10.1038/s41467-021-26095-0), 2021-10-12
Supplement: 41467_2021_26095_MOESM1_ESM.pdf [file 41467_2021_26095_MOESM1_ESM.pdf]

## Supplemental Information

### Endurance Exercise Training-Responsive miR-19b-3p Improves Skeletal Muscle Glucose Metabolism

Julie Massart<sup>1,\*</sup>, Rasmus J.O. Sjögren<sup>1,\*</sup>, Brendan Egan<sup>2,3</sup>, Christian Garde<sup>4</sup>, Magnus Lindgren<sup>1</sup>, Weifeng Gu<sup>5,7</sup>, Duarte MS Ferreira<sup>6</sup>, Mutsumi Katayama<sup>2</sup>, Jorge L Ruas<sup>6</sup>, Romain Barrès<sup>4</sup>, Donal J. O’Gorman<sup>3</sup>, Juleen R. Zierath<sup>1,2,4</sup>, and Anna Krook<sup>2\*</sup>

**Running Title:** miRNA-dependent regulation of metabolism following exercise training

Affiliations: <sup>1</sup>Department of Molecular Medicine and Surgery, Section of Integrative Physiology, Karolinska Institute, Stockholm, Sweden; <sup>2</sup>Department of Physiology and Pharmacology, Section of Integrative Physiology, Karolinska Institutet, Stockholm, Sweden; <sup>3</sup>Department of Health & Human Performance, Dublin City University, Ireland; <sup>4</sup>Novo Nordisk Foundation Center for Basic Metabolic Research, University of Copenhagen, Denmark; <sup>5</sup> University of Massachusetts Medical School, Worcester, MA Department of Cell Biology and Neuroscience, University of California at Riverside, Riverside, California, USA; and <sup>6</sup>Department of Physiology and Pharmacology, Section of Molecular & Cellular Exercise Physiology, Karolinska Institutet, Stockholm, Sweden. \*These authors contributed equally: <sup>7</sup>Current address; Department of Cell Biology and Neuroscience, University of California at Riverside, Riverside, California, USA .

**Corresponding Author:** Anna Krook  
Department of Physiology and Pharmacology,  
Section of Integrative Physiology,  
Karolinska Institutet,  
Biomedicum 4C  
Solnavägen 9,  
SE 171 77 Stockholm, Sweden  
Phone: +46 (0) 8 524 878 24  
Fax: +46 (0) 8 33 54 36  
E-mail: anna.krook@ki.se

# Supplementary Figure 1

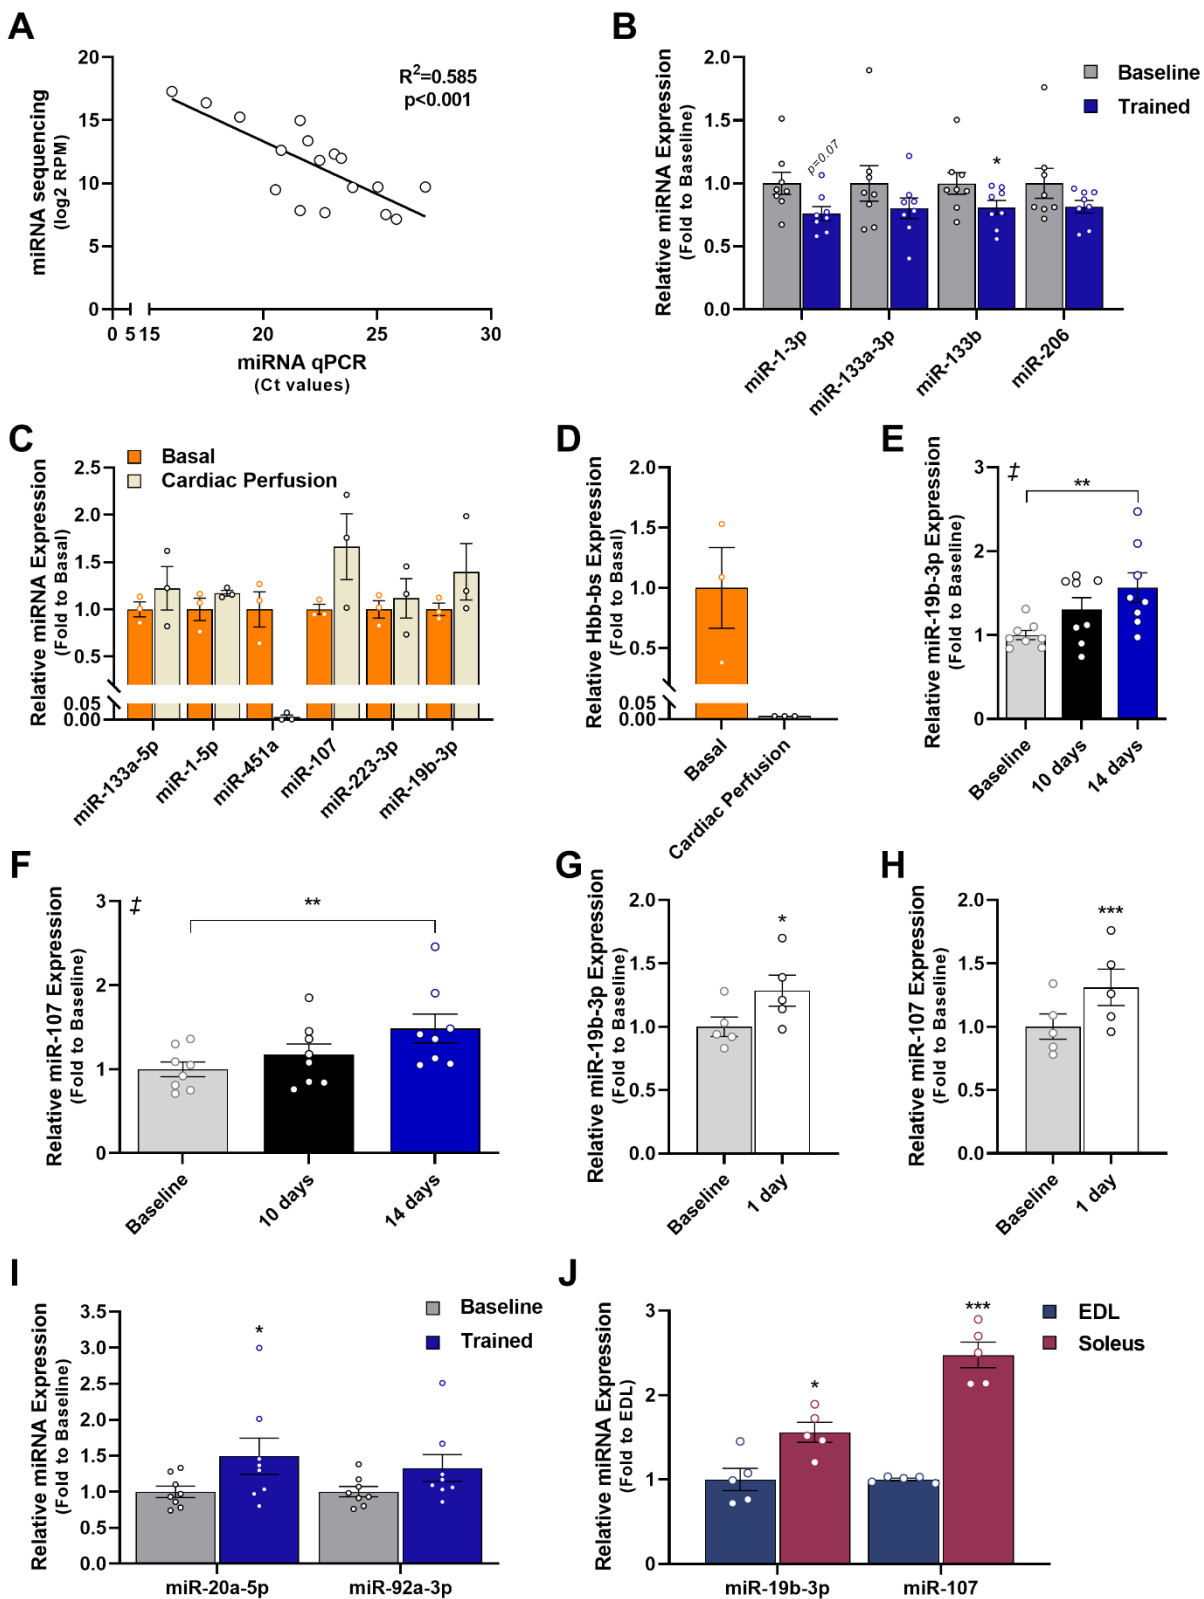

**Supplementary Figure 1. Related to Figure 1.** A) Correlation of short RNA sequencing and RT-qPCR data representing expression of 17 miRNAs in human skeletal muscle biopsies ( $p=0.0004$ ,  $n=3$  individuals). B) RT-qPCR determination of miRNA expression before (Baseline) and after aerobic exercise training (Trained) of myo-miRs ( $p=0.0371$  for miR-133b,  $n=8$  individuals). C) miRNA and D) Hbb-bs gene expression in soleus skeletal muscle of mice subjected to cardiac perfusion or not (Basal) determined by RT-qPCR ( $n=3$  independent mouse samples). E-F) Expression of E) miR-19b-3p ( $p=0.0023$  at day 14) and F) miR-107 ( $p=0.0053$  at day 14) determined by RT-qPCR prior to exercise training (Baseline) or following 10 or 14 days of aerobic exercise training ( $n=8$  individuals). G-H) Expression of G) miR-19b-3p ( $p=0.0129$ ) and H) miR-107 ( $p=0.0001$ ) prior to exercise training (Baseline) or 16 hours after the first bout of exercise (1 day) as determined by RT-qPCR ( $n=5$  individuals). I) Expression of miR-20a-5p ( $p=0.0384$ ) and miR-92a-3p prior to exercise training (Baseline) or following 14 days of aerobic exercise training (Trained) as determined by RT-qPCR ( $n=8$  individuals). J) miR-19b-3p ( $p=0.0139$ ) and miR-107 ( $p=0.0001$ ) expression in mouse soleus and EDL skeletal muscle of mice ( $n=5$  independent mouse samples). Data are mean  $\pm$  SEM. miRNA expression was normalized to miR-186-5p in human and mouse samples. Gene expression in mouse skeletal muscle was normalized to *Tbp*. ‡ Endurance exercise training effect; and \* $p<0.05$ , \*\* $p<0.01$ , \*\*\* $p<0.001$  by two-tailed non-paired or paired Student's t-test or by repeated measures 1-way ANOVA with Dunnett's post hoc testing.

## Supplementary Figure 2

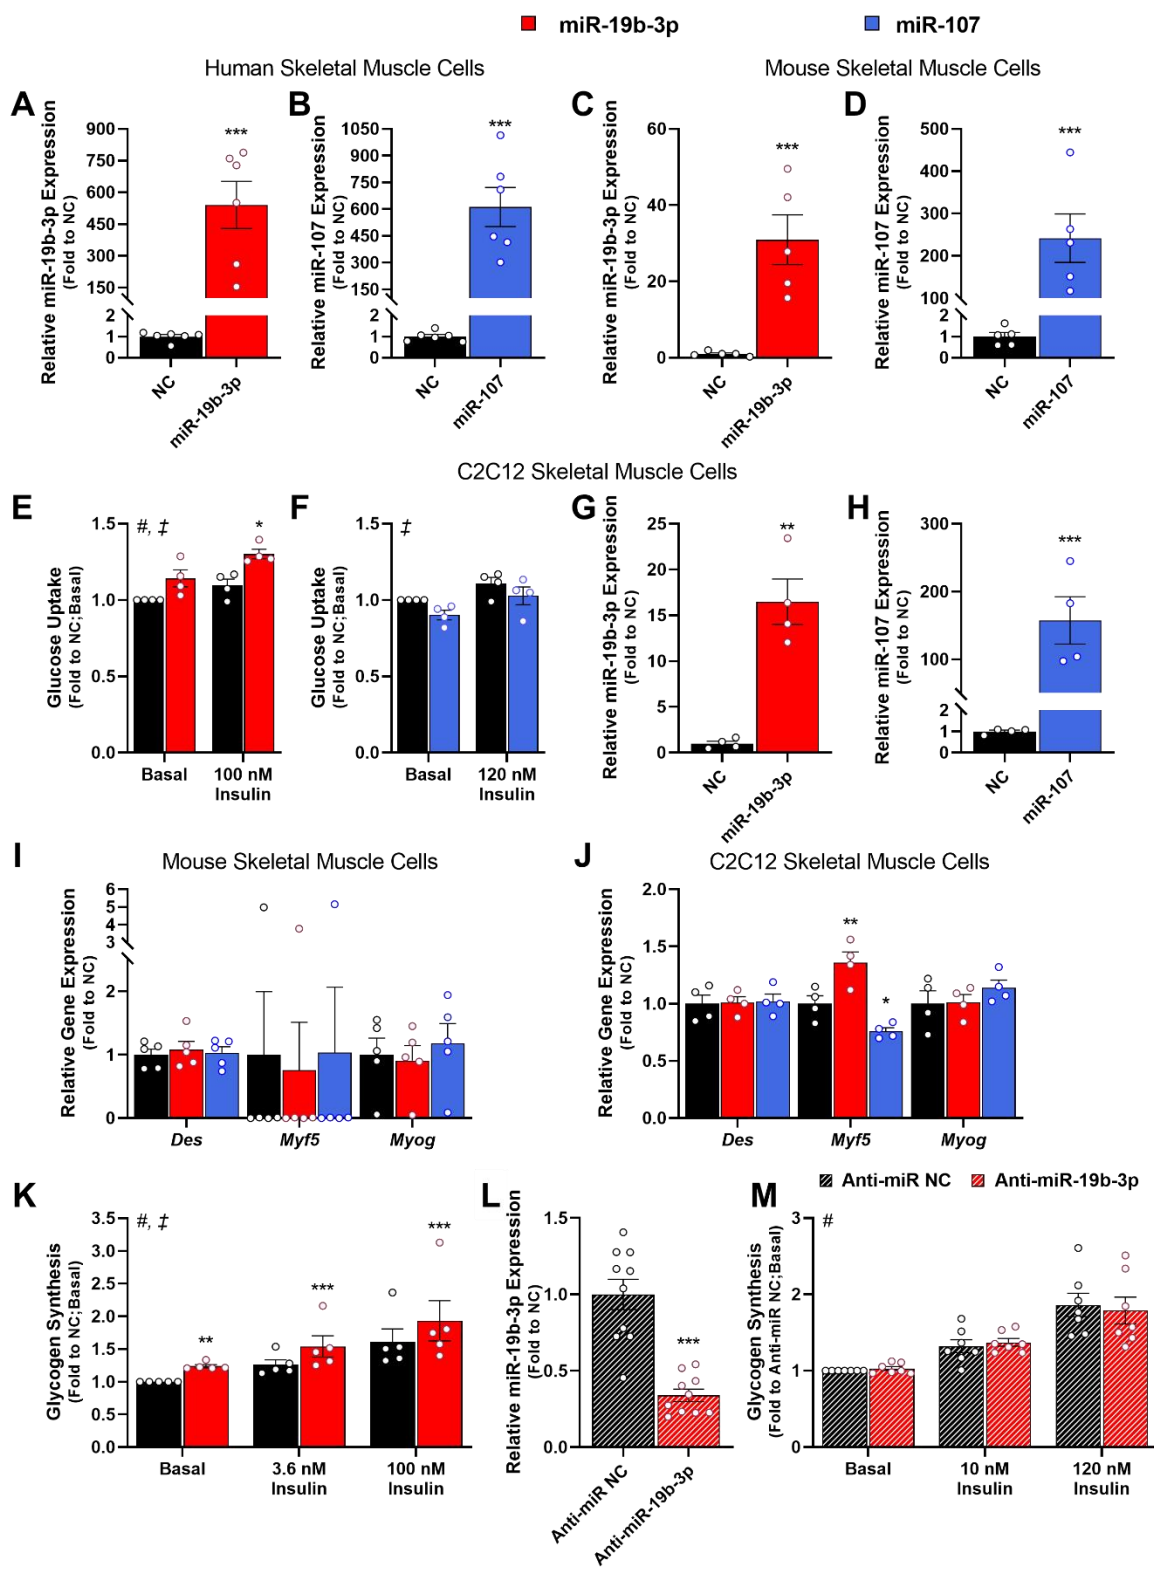

**Supplementary Figure 2. Related to Figure 2,** Myotubes were transfected with miR-19b-3p or miR-107 precursors or a negative control (NC) miRNA precursor. A-B) Overexpression of A) miR-19b-3p (p=0.0001) and B) miR-107 (p=0.0001) was assessed by RT-qPCR in human skeletal muscle cells (n=6 independent cell culture experiments). C-D) Overexpression of C) miR-19b-3p (p=0.0006) and D) miR-107 (p=0.0001) was assessed by RT-qPCR in mouse skeletal muscle cells (n=5 independent cell culture experiments). E-F) C2C12 myotubes were incubated in the absence (Basal) or presence of insulin (100 nM) to determine the effect of E) miR-19b-3p (p=0.049 following 100 nM insulin) and F) miR-107 overexpression on glucose uptake (n=4 independent cell culture experiments). G-H) Overexpression of G) miR-19b-3p (p=0.0028) and H) miR-107 (p=0.0002) was assessed by RT-qPCR in C2C12 skeletal muscle cells (n=4 independent cell culture experiments). I-J) Expression of *Des*, *Myf5*, and *Myog* was determined by RT-qPCR in I) mouse skeletal muscle cells or J) C2C12 skeletal muscle cells following overexpressing of either miR-19b-3p or miR-107 (n=4 independent cell culture experiments). (C2C12: miR-19b-3p p=0.0033 and miR-107 p=0.019 for *Myf5*). K) Mouse myotubes were incubated in the absence (Basal) or presence of insulin (3.6 nM or 100 nM) to determine the effects of miR-19b-3p overexpression on glucose incorporation into glycogen (n=5 independent cell culture experiments). (Basal p=0.0016, 3.6 nM insulin p=0.0006, and 100 nM insulin p=0.0003). L) Expression of *miR-19b-3p* was determined by RT-qPCR following transfection of human myotubes with either an anti-miR negative control (NC) or anti-miR-19b-3p inhibitor (p=0.0001, n=10 independent cell culture experiments). M) Human myotubes were incubated in the absence (Basal) or presence of insulin (10 nM or 120 nM) to determine the effects of miR-19b-3p inhibition on glucose incorporation into glycogen (n=7 independent cell culture experiments). Data are mean  $\pm$  SEM. miRNA expression was normalized to miR-186-5p and gene expression to *Tbp*. # Treatment effect; ‡ miRNA effect; and \*p<0.05, \*\*p<0.01, \*\*\*p<0.001 by two-tailed paired Student's t-test or 2-way repeated measures ANOVA with Sidak's post hoc testing when appropriate.

Supplementary Figure 3

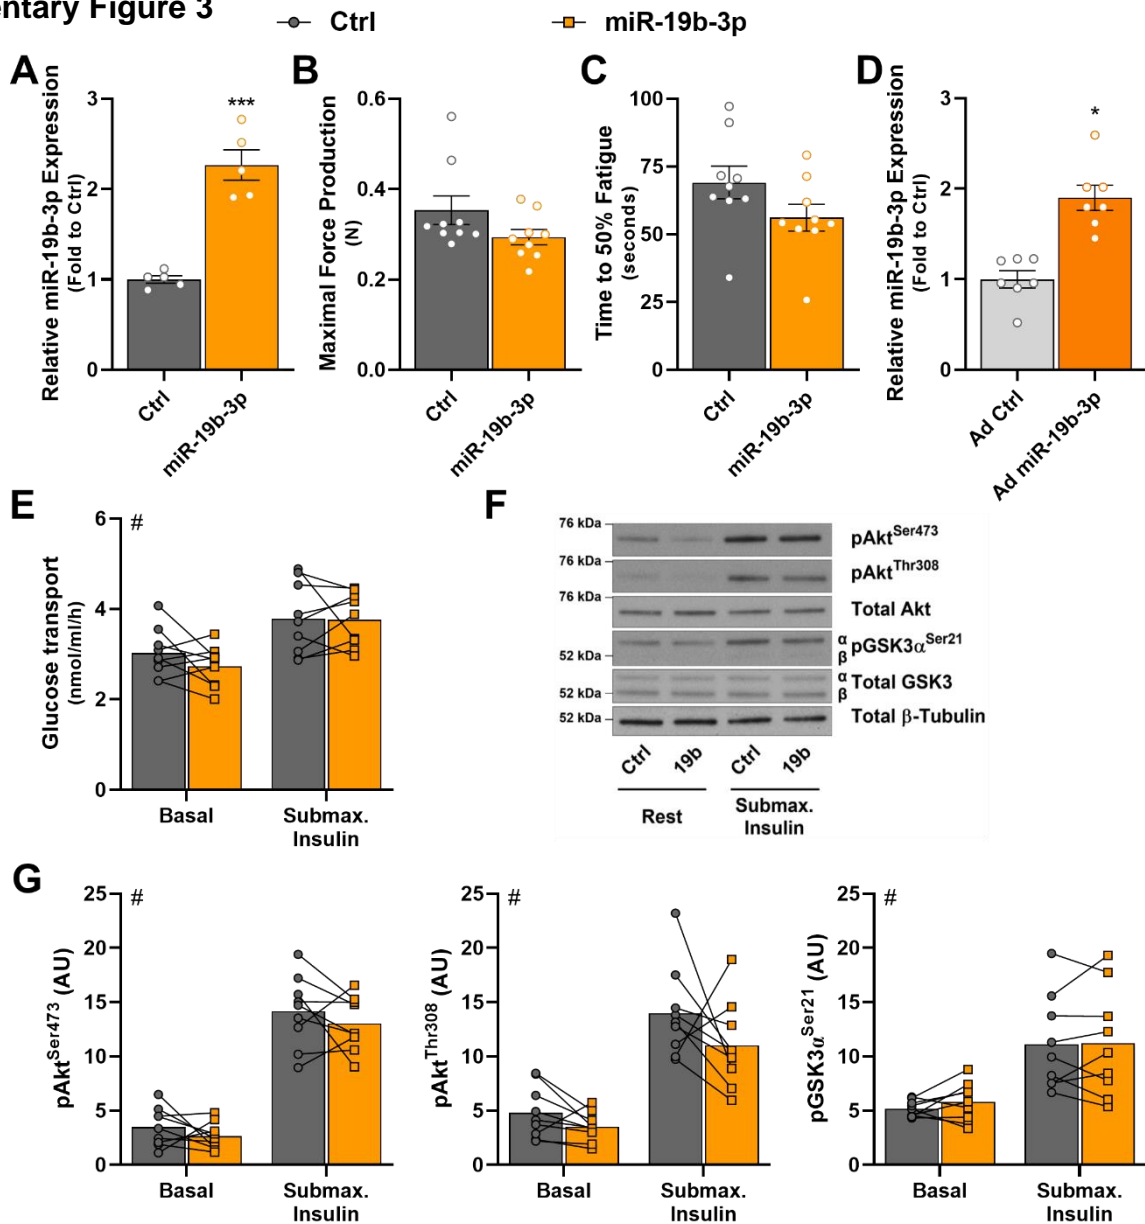

**Supplementary Figure 3. Related to Figure 3.** Mouse flexor digitorum brevis (FDB) skeletal muscles were electroporated with a control (Ctrl) or a miR-19b-3p-encoding plasmid and 1 week later muscles were subjected to electrical pulse-stimulated contraction or stimulated with insulin in vitro. A) Overexpression of miR-19b-3p was assessed by RT-qPCR in FDB skeletal muscle ( $p=0.001$ ) ( $n=5$  independent mouse samples). B) Maximal force (N) produced during electrical pulse-stimulated contraction in vitro by FDB muscles electroporated with control or miR-19b-3p-encoding plasmids ( $n=9$  independent mouse samples). C) The time (in seconds) to reduce force production by 50% in FDB muscles during electrical pulse-stimulated contraction in vitro ( $n=9$  independent mouse samples). D) RT-qPCR analysis of miR-19b-3p expression (normalized to miR-186-5p) in mouse FDB-transduced skeletal muscle 7-day post injection with a control (Ad Ctrl) or *mmu-miR-19b-1*-expressing adenovirus (Ad miR-19b-1) ( $p=0.016$ ) ( $n=7$  independent

mouse samples). E) FDB skeletal muscles electroporated with either control or miR-19b-3p-encoding plasmid were treated in vitro in absence (Basal) or presence of 3.6 nM insulin (Submax. Insulin) followed by measurement of glucose transport (n=9 independent mouse samples). F) Representative immunoblots of FDB skeletal muscle to determine the effects of miR-19b-3p overexpression on protein phosphorylation following treatment in absence or presence of 3.6 nM insulin (Submax. Insulin) in vitro. G) Quantification of (E) for phosphorylation of Akt (Thr<sup>308</sup> and Ser<sup>473</sup>) and GSK3 $\alpha$  (Ser<sup>21</sup>) (n=9 independent mouse samples). Data are mean  $\pm$  SEM. miRNA expression was normalized to miR-186-5p. # Insulin effect by repeated measures 2-way ANOVA; and \*\*\*p<0.001 by two-tailed paired Student's t-test.

### Supplementary Figure 4

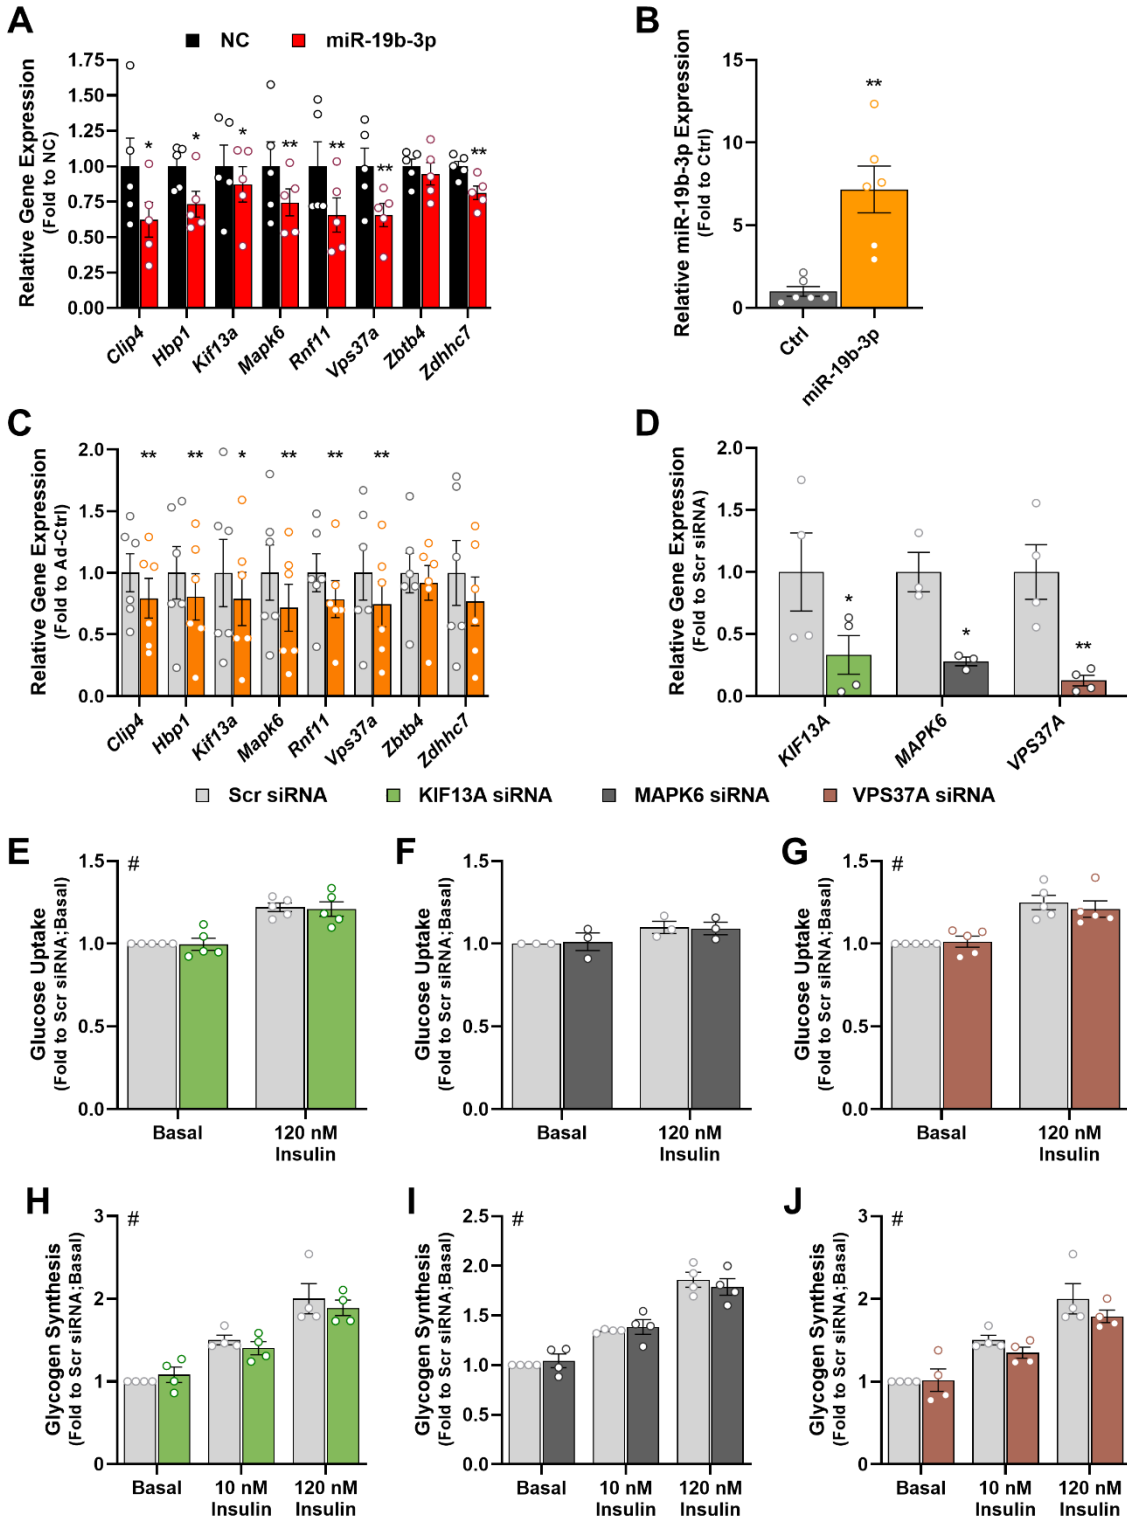



**Supplementary Figure 4. Related to Figure 4.** A) Mouse skeletal muscle myotubes were transfected with a negative control miRNA (NC) or miR-19b-3p mimics and gene expression of *Clip4* (p=0.0124), *Hbp1* (p=0.0318), *Kif13a* (p=0.0323), *Mapk6* (p=0.0086), *Rnf11* (p=0.008), *Vps37a* (p=0.0022), *Zbtb4*, and *Zdhhc7* (p=0.0027) was determined by RT-qPCR (n=5 independent cell culture experiments). Gene expression was normalized to *Tbp* expression. B) RT-qPCR analysis of miR-19b-3p expression (normalized to miR-186-5p) in mouse tibialis anterior skeletal muscle following electroporation with a control (Ctrl) or pri-miR-19b-3p-encoding plasmid (p=0.0055, n=6 independent mouse samples). C) RT-qPCR analysis of gene expression of *Clip4* (p=0.00015), *Hbp1* (p=0.0024), *Kif13a* (p=0.022), *Mapk6* (p=0.0016), *Rnf11* (p=0.0077), *Vps37a* (p=0.0043), *Zbtb4*, and *Zdhhc7* in mouse FDB-transduced skeletal muscle 7-day post injection with a control (Ad Ctrl) or *mmu-miR-19b-1*-expressing adenovirus (Ad miR-19b-1) (n=6 independent mouse samples) normalized to *Tbp* expression. D) Human skeletal muscle myotubes were transfected with a scrambled siRNA sequence (Scr siRNA) or gene specific siRNA sequences targeting KIF13A (n=4 independent cell culture experiments, p=0.0318), MAPK6 (n=3 independent cell culture experiments, p=0.0195), or VPS37A (n=4 independent cell culture experiments, p=0.0029), and thereafter gene expression was determined by RT-qPCR. Gene expression was normalized to the geometrical mean of *GUSB* and *TBP* expression. E-G) Human skeletal muscle myotubes were incubated in the absence (Basal) or presence of insulin (120 nM) to determine glucose uptake rate following silencing of E) KIF13A (n=5 independent cell culture experiments), F) MAPK6 (n=3 independent cell culture experiments), or G) VPS37A (n=5 independent cell culture experiments). H-J) Glycogen synthesis rate was determined in human skeletal muscle cells in the absence (Basal) or presence of insulin (10 nM or 120 nM) following silencing of H) KIF13A (n=4 independent cell culture experiments), I) MAPK6 (n=4 independent cell culture experiments), J) VPS37A (n=4 independent cell culture experiments). Data are mean  $\pm$  SEM. # Contraction or Insulin effect; ‡ miRNA effect using repeated measures 2-way ANOVA; and \*p<0.05, \*\*p<0.01 and \*\*\*p<0.001 by two-tailed paired Student's t-test.

**SUPPLEMENTARY TABLES**

**Supplementary Table 1: miRNAs with >100 reads per million (RPM) in at least half of the human skeletal muscle biopsies used for miRNA sequencing, related to figure 1.**

| <b>miRNA</b>    | <b>Pre Exercise Training<br/>(RPM)</b> | <b>Post Exercise Training<br/>(RPM)</b> |
|-----------------|----------------------------------------|-----------------------------------------|
| hsa-miR-1-3p    | 208397 ± 61354                         | 113142 ± 42193                          |
| hsa-miR-133a-3p | 37577 ± 16582                          | 40720 ± 3764                            |
| hsa-let-7c-5p   | 31870 ± 13260                          | 35960 ± 10720                           |
| hsa-miR-133b    | 31238 ± 15654                          | 33737 ± 2688                            |
| hsa-let-7b-5p   | 31047 ± 12910                          | 35286 ± 10556                           |
| hsa-let-7a-5p   | 29562 ± 12453                          | 33421 ± 9969                            |
| hsa-let-7f-5p   | 21434 ± 8186                           | 24718 ± 6744                            |
| hsa-miR-29c-3p  | 19759 ± 5915                           | 19675 ± 3012                            |
| hsa-miR-451a    | 18272 ± 7608                           | 153160 ± 81194                          |
| hsa-miR-206     | 12371 ± 1978                           | 8731 ± 1772                             |
| hsa-miR-23b-3p  | 11948 ± 823                            | 15887 ± 2834                            |
| hsa-miR-24-3p   | 11488 ± 2580                           | 5700 ± 743                              |
| hsa-miR-23a-3p  | 10891 ± 736                            | 14213 ± 2422                            |
| hsa-miR-29a-3p  | 10389 ± 2306                           | 9082 ± 1691                             |
| hsa-miR-26a-5p  | 10309 ± 1110                           | 10733 ± 1477                            |
| hsa-miR-378a-3p | 8861 ± 2238                            | 3777 ± 3269                             |
| hsa-miR-22-5p   | 7947 ± 707                             | 2377 ± 563                              |
| hsa-miR-378c    | 5864 ± 1642                            | 2268 ± 2009                             |
| hsa-miR-101-3p  | 5482 ± 4092                            | 11758 ± 2979                            |
| hsa-let-7i-5p   | 5223 ± 3089                            | 9028 ± 1509                             |
| hsa-let-7g-5p   | 5040 ± 3081                            | 8748 ± 1406                             |
| hsa-miR-29b-3p  | 4780 ± 998                             | 6100 ± 678                              |
| hsa-let-7d-5p   | 4343 ± 2259                            | 3153 ± 410                              |
| hsa-miR-133a-5p | 4342 ± 487                             | 2895 ± 2127                             |
| hsa-miR-126-3p  | 4068 ± 1768                            | 5276 ± 1628                             |
| hsa-miR-499a-5p | 3789 ± 765                             | 3249 ± 123                              |
| hsa-miR-126-5p  | 3308 ± 696                             | 2352 ± 395                              |
| hsa-miR-26b-5p  | 3166 ± 233                             | 2570 ± 519                              |
| hsa-miR-21-5p   | 3098 ± 793                             | 8360 ± 3289                             |
| hsa-miR-145-5p  | 2902 ± 2417                            | 784 ± 178                               |
| hsa-miR-486-5p  | 2839 ± 582                             | 3984 ± 535                              |

|                 |             |            |
|-----------------|-------------|------------|
| hsa-miR-27b-3p  | 2210 ± 1044 | 3473 ± 698 |
| hsa-miR-27a-3p  | 2107 ± 975  | 3359 ± 669 |
| hsa-miR-30a-3p  | 2047 ± 15   | 1630 ± 152 |
| hsa-miR-30e-3p  | 2025 ± 12   | 1613 ± 149 |
| hsa-miR-16-5p   | 1808 ± 1122 | 1868 ± 120 |
| hsa-miR-125b-5p | 1783 ± 71   | 1750 ± 565 |
| hsa-miR-199a-3p | 1528 ± 401  | 1777 ± 392 |
| hsa-miR-199b-3p | 1527 ± 401  | 1777 ± 392 |
| hsa-miR-378a-5p | 1499 ± 608  | 1228 ± 179 |
| hsa-miR-30b-5p  | 1423 ± 159  | 1484 ± 542 |
| hsa-miR-22-3p   | 1195 ± 75   | 1634 ± 421 |
| hsa-miR-95-3p   | 1191 ± 244  | 1477 ± 149 |
| hsa-miR-30a-5p  | 1082 ± 563  | 2234 ± 130 |
| hsa-miR-193b-3p | 991 ± 301   | 955 ± 393  |
| hsa-miR-143-3p  | 951 ± 256   | 1311 ± 213 |
| hsa-miR-181a-5p | 937 ± 108   | 967 ± 134  |
| hsa-miR-365b-3p | 904 ± 231   | 1261 ± 342 |
| hsa-miR-365a-3p | 904 ± 231   | 1261 ± 342 |
| hsa-miR-196a-5p | 889 ± 42    | 790 ± 182  |
| hsa-miR-195-5p  | 884 ± 108   | 745 ± 107  |
| hsa-miR-99a-5p  | 876 ± 134   | 1180 ± 157 |
| hsa-miR-100-5p  | 868 ± 132   | 1171 ± 156 |
| hsa-miR-15a-5p  | 815 ± 457   | 932 ± 113  |
| hsa-miR-15b-5p  | 749 ± 210   | 882 ± 132  |
| hsa-miR-92a-3p  | 694 ± 66    | 741 ± 210  |
| hsa-miR-30d-5p  | 661 ± 306   | 2237 ± 88  |
| hsa-miR-30c-5p  | 641 ± 111   | 999 ± 228  |
| hsa-miR-128-3p  | 538 ± 207   | 412 ± 117  |
| hsa-miR-221-3p  | 530 ± 254   | 875 ± 61   |
| hsa-let-7e-5p   | 504 ± 90    | 563 ± 149  |
| hsa-miR-98-5p   | 429 ± 284   | 664 ± 173  |
| hsa-miR-378d    | 396 ± 64    | 200 ± 188  |
| hsa-miR-144-3p  | 346 ± 77    | 464 ± 224  |
| hsa-miR-181b-5p | 344 ± 33    | 251 ± 42   |
| hsa-miR-93-5p   | 332 ± 40    | 228 ± 53   |
| hsa-miR-320a    | 309 ± 52    | 1002 ± 292 |
| hsa-miR-320b    | 280 ± 48    | 894 ± 259  |
| hsa-miR-140-3p  | 272 ± 26    | 539 ± 107  |

|                 |           |            |
|-----------------|-----------|------------|
| hsa-miR-30e-5p  | 264 ± 108 | 1375 ± 313 |
| hsa-miR-191-5p  | 263 ± 15  | 478 ± 37   |
| hsa-miR-196b-5p | 249 ± 14  | 255 ± 55   |
| hsa-miR-361-5p  | 229 ± 6   | 205 ± 27   |
| hsa-miR-423-3p  | 213 ± 18  | 464 ± 73   |
| hsa-miR-29c-5p  | 209 ± 29  | 633 ± 110  |
| hsa-miR-20a-5p  | 206 ± 53  | 252 ± 52   |
| hsa-miR-320d    | 197 ± 36  | 582 ± 159  |
| hsa-miR-320e    | 194 ± 36  | 576 ± 157  |
| hsa-miR-152-3p  | 184 ± 59  | 282 ± 81   |
| hsa-miR-103a-3p | 176 ± 63  | 1500 ± 166 |
| hsa-miR-107     | 175 ± 63  | 1495 ± 167 |
| hsa-let-7d-3p   | 171 ± 37  | 210 ± 22   |
| hsa-miR-1297    | 160 ± 14  | 138 ± 32   |
| hsa-miR-125a-5p | 160 ± 64  | 186 ± 58   |
| hsa-miR-193b-5p | 141 ± 57  | 146 ± 35   |
| hsa-miR-1827    | 138 ± 57  | 197 ± 84   |
| hsa-miR-660-5p  | 133 ± 21  | 232 ± 80   |
| hsa-miR-362-3p  | 126 ± 30  | 108 ± 27   |
| hsa-miR-29a-5p  | 124 ± 47  | 148 ± 29   |
| hsa-miR-199a-5p | 120 ± 51  | 372 ± 106  |
| hsa-miR-342-3p  | 118 ± 18  | 103 ± 19   |
| hsa-miR-144-5p  | 134 ± 43  | 90 ± 46    |
| hsa-miR-190a-5p | 107 ± 34  | 92 ± 9     |
| hsa-miR-374b-5p | 96 ± 9    | 127 ± 9    |
| hsa-miR-497-5p  | 89 ± 22   | 225 ± 48   |
| hsa-miR-425-5p  | 83 ± 13   | 110 ± 12   |
| hsa-miR-199b-5p | 75 ± 32   | 129 ± 31   |
| hsa-miR-1-5p    | 71 ± 42   | 337 ± 129  |
| hsa-miR-484     | 60 ± 5    | 170 ± 6    |
| hsa-miR-130a-3p | 57 ± 16   | 167 ± 13   |
| hsa-miR-223-3p  | 44 ± 34   | 325 ± 15   |
| hsa-miR-19b-3p  | 38 ± 8    | 248 ± 52   |

Short RNA sequencing of human skeletal muscle biopsies at baseline (pre exercise training) and following two weeks of endurance exercise training (post exercise training) was utilized to determine miRNA abundance in skeletal muscle biopsies (reads per million (RPM) > 100 in at least three samples). Results are mean ± SEM for three biopsies per condition.

**Supplementary Table 2: Quantification of total and phosphorylated proteins following miR-19b-3p overexpression in human skeletal muscle cells, related to figure 2.**

|                | Basal     |                           | 10 nM Insulin |                             | 120 nM Insulin |                   | ANOVA Summary |
|----------------|-----------|---------------------------|---------------|-----------------------------|----------------|-------------------|---------------|
|                | NC        | <i>miR-19b-3p</i>         | NC            | <i>miR-19b-3p</i>           | NC             | <i>miR-19b-3p</i> |               |
| pTBC1D1 (S237) | 1.00±0.28 | 1.57±0.46                 | 1.26±0.33     | 1.76±0.28                   | 1.09±0.20      | 1.84±0.53         | ‡             |
| Tot. TBC1D1    | 1.00±0.23 | 1.44±0.31**<br>(p=0.0036) | 1.10±0.27     | 1.50±0.27**<br>(p=0.0069)   | 1.14±0.26      | 1.38±0.31         | ‡             |
| pAS160 (T642)  | 1.00±0.21 | 2.50±0.53**<br>(p=0.0080) | 3.54±0.82     | 6.11±0.61***<br>(p=0.0001)  | 6.81±0.65      | 7.59±0.64         | #, ‡, \$      |
| Tot. AS160     | 1.00±0.21 | 1.08±0.17                 | 1.23±0.13     | 1.45±0.17                   | 1.29±0.19      | 1.52±0.22         |               |
| pGS (S641)     | 1.00±0.18 | 1.02±0.19                 | 0.98±0.19     | 1.07±0.17                   | 1.05±0.21      | 0.99±0.16         |               |
| Tot. GS        | 1.00±0.11 | 0.95±0.15                 | 1.14±0.13     | 1.27±0.14                   | 1.66±0.20      | 1.55±0.17         | #             |
| pAkt (S473)    | 1.00±0.59 | 1.76±1.78                 | 22.16±6.43    | 66.06±15.56**<br>(p=0.0063) | 176.43±21.27   | 200.73±19.88      | #             |
| pAkt (T308)    | 1.00±0.59 | 2.67±1.43                 | 13.48±4.26    | 40.27±7.26**                | 95.79±6.80     | 101.31±5.66       | #, \$         |
| Tot. Akt       | 1.00±0.07 | 1.01±0.04                 | 0.99±0.04     | 1.04±0.02                   | 0.96±0.03      | 1.04±0.03         |               |
| pGSK3α (S21)   | 1.00±0.10 | 1.54±0.18*<br>(p=0.0237)  | 1.48±0.21     | 2.53±0.20***<br>(p=0.0002)  | 2.52±0.34      | 2.95±0.33         | #, ‡          |

|                    |                 |                                 |                 |                                 |                 |                 |   |
|--------------------|-----------------|---------------------------------|-----------------|---------------------------------|-----------------|-----------------|---|
| Tot. GSK3 $\alpha$ | 1.00 $\pm$ 0.11 | 1.41 $\pm$ 0.18**<br>(p=0.0038) | 1.09 $\pm$ 0.10 | 1.51 $\pm$ 0.09**<br>(p=0.0036) | 1.00 $\pm$ 0.13 | 1.25 $\pm$ 0.17 | ‡ |
| pGSK3 $\beta$ (S9) | 1.00 $\pm$ 0.12 | 0.89 $\pm$ 0.14                 | 1.62 $\pm$ 0.24 | 1.79 $\pm$ 0.22                 | 2.45 $\pm$ 0.30 | 2.28 $\pm$ 0.31 | # |
| Tot. GSK3 $\beta$  | 1.00 $\pm$ 0.12 | 0.98 $\pm$ 0.13                 | 1.03 $\pm$ 0.08 | 1.01 $\pm$ 0.08                 | 0.95 $\pm$ 0.08 | 0.96 $\pm$ 0.11 |   |

Myotubes were transfected with miRNA precursors for either miR-19b-3p or with a negative control (NC) and were thereafter incubated in absence (Basal) or presence of insulin (10 nM or 120 nM) for 10 minutes. Phosphorylation and total protein abundance were determined by Western blot. Results are mean  $\pm$  SEM expressed as fold to NC for n=6 independent cell culture experiments. # Treatment (Insulin) effect; ‡ miRNA (miR-19b-3p) effect; \$ Interaction; and \*p<0.05, \*\*p<0.01, \*\*\*p<0.001 comparing Neg. Control vs miR-19b-3p by a 2-way repeated measures ANOVA with Sidak's post hoc testing.

**Supplementary Table 3: Gene ontology analysis following miR-19b-3p overexpression in human skeletal muscle cells, related to figure 4.**

| <b>Gene Ontology ID</b> | <b>Description</b>                     | <b>Gene Ratio</b> | <b>Background Ratio</b> | <b>p-value</b> | <b>p.adjust</b> |
|-------------------------|----------------------------------------|-------------------|-------------------------|----------------|-----------------|
| GO:0030198              | extracellular matrix organization      | 28/590            | 327/16303               | 2.33E-05       | 4.02E-02        |
| GO:0043062              | extracellular structure organization   | 28/590            | 328/16303               | 2.46E-05       | 4.02E-02        |
| GO:0016125              | sterol metabolic process               | 17/590            | 151/16303               | 3.36E-05       | 4.02E-02        |
| GO:0008299              | isoprenoid biosynthetic process        | 7/590             | 27/16303                | 3.70E-05       | 4.02E-02        |
| GO:0061082              | myeloid leukocyte cytokine production  | 6/590             | 22/16303                | 9.95E-05       | 5.42E-02        |
| GO:0008203              | cholesterol metabolic process          | 15/590            | 134/16303               | 1.03E-04       | 5.42E-02        |
| GO:0008202              | steroid metabolic process              | 25/590            | 304/16303               | 1.21E-04       | 5.42E-02        |
|                         | positive regulation of cell projection |                   |                         |                |                 |
| GO:0031346              | organization                           | 26/590            | 323/16303               | 1.26E-04       | 5.42E-02        |
| GO:1902652              | secondary alcohol metabolic process    | 15/590            | 138/16303               | 1.43E-04       | 5.42E-02        |
| GO:0006024              | glycosaminoglycan biosynthetic process | 13/590            | 109/16303               | 1.55E-04       | 5.42E-02        |
| GO:1903034              | regulation of response to wounding     | 16/590            | 155/16303               | 1.60E-04       | 5.42E-02        |
|                         | organic hydroxy compound metabolic     |                   |                         |                |                 |
| GO:1901615              | process                                | 34/590            | 482/16303               | 1.67E-04       | 5.42E-02        |
| GO:0006023              | aminoglycan biosynthetic process       | 13/590            | 110/16303               | 1.70E-04       | 5.42E-02        |
| GO:0016266              | O-glycan processing                    | 9/590             | 57/16303                | 1.91E-04       | 5.42E-02        |
| GO:0061564              | axon development                       | 33/590            | 466/16303               | 1.93E-04       | 5.42E-02        |

|            |                                          |        |           |          |          |
|------------|------------------------------------------|--------|-----------|----------|----------|
| GO:0006066 | alcohol metabolic process                | 25/590 | 314/16303 | 2.00E-04 | 5.42E-02 |
|            | negative regulation of osteoclast        |        |           |          |          |
| GO:0045671 | differentiation                          | 6/590  | 26/16303  | 2.71E-04 | 6.94E-02 |
| GO:0045670 | regulation of osteoclast differentiation | 9/590  | 62/16303  | 3.67E-04 | 8.85E-02 |
| GO:0006909 | phagocytosis                             | 19/590 | 219/16303 | 3.96E-04 | 9.05E-02 |
|            | positive regulation of myeloid leukocyte |        |           |          |          |
|            | cytokine production involved in immune   |        |           |          |          |
| GO:0061081 | response                                 | 4/590  | 11/16303  | 4.57E-04 | 9.94E-02 |

Myotubes were transfected with miRNA precursors for either miR-19b-3p or with a negative control (NC) and gene expression was determined by microarray analysis. miR-19b-3p-regulated gene ontologies (p.adjust<0.1) are reported (Benjamini Hochberg adjustment).



**Supplementary Table 4: miR-19b-3p predicted targets downregulated by miR-19b-3p overexpression or aerobic exercise training, related to figure 4.**

| <b>Gene Symbol</b> | <b>Log2 FC<br/>(19b-3p OE)</b> | <b>p-value<br/>(19b-3p OE)</b> | <b>Number of hits in<br/>exercise studies</b> |
|--------------------|--------------------------------|--------------------------------|-----------------------------------------------|
| <i>RNF11</i>       | -2.10                          | 4.77E-05                       | 2                                             |
| <i>CLIP4</i>       | -1.07                          | 1.29E-03                       | 2                                             |
| <i>RRM2B</i>       | -1.06                          | 1.58E-04                       | 2                                             |
| <i>MAPK6</i>       | -0.99                          | 2.45E-04                       | 3                                             |
| <i>TPCN1</i>       | -0.96                          | 4.37E-04                       | 2                                             |
| <i>VPS37A</i>      | -0.92                          | 1.82E-03                       | 3                                             |
| <i>ZDHHC7</i>      | -0.91                          | 1.17E-03                       | 2                                             |
| <i>CACUL1</i>      | -0.87                          | 4.61E-04                       | 2                                             |
| <i>EPG5</i>        | -0.85                          | 4.21E-04                       | 2                                             |
| <i>HBP1</i>        | -0.85                          | 6.60E-04                       | 2                                             |
| <i>PHF20</i>       | -0.84                          | 6.18E-04                       | 3                                             |
| <i>FBXO32</i>      | -0.80                          | 8.13E-04                       | 2                                             |
| <i>ZBTB4</i>       | -0.80                          | 3.12E-03                       | 3                                             |
| <i>JUND</i>        | -0.80                          | 5.79E-03                       | 3                                             |
| <i>KIF13A</i>      | -0.76                          | 2.57E-03                       | 3                                             |
| <i>RNF144B</i>     | -0.75                          | 3.09E-03                       | 3                                             |
| <i>CLIP1</i>       | -0.70                          | 3.08E-03                       | 3                                             |
| <i>JMY</i>         | -0.68                          | 3.58E-03                       | 2                                             |
| <i>MDFIC</i>       | -0.66                          | 2.27E-03                       | 2                                             |
| <i>TRIM23</i>      | -0.63                          | 6.39E-03                       | 2                                             |
| <i>TMEM47</i>      | -0.63                          | 2.34E-03                       | 2                                             |
| <i>DEK</i>         | -0.63                          | 2.29E-03                       | 2                                             |
| <i>PNRC1</i>       | -0.63                          | 5.42E-03                       | 3                                             |
| <i>RAB21</i>       | -0.62                          | 6.40E-03                       | 3                                             |
| <i>YIPF6</i>       | -0.62                          | 2.31E-03                       | 3                                             |

|             |       |          |   |
|-------------|-------|----------|---|
| <i>DLG5</i> | -0.61 | 6.70E-03 | 2 |
|-------------|-------|----------|---|

Myotubes were transfected with miRNA precursors for either miR-19b-3p or with a negative control (NC) and gene expression was determined by microarray analysis. miR-19b-3p-regulated genes were overlapped with genes altered in publicly available microarray studies representing aerobic exercise training<sup>8, 15, 16</sup>. miR-19b-3p predicted targets (TargetScan or microRNA.org) with similar fold change directionality following miR-19b-3p overexpression and in at least two of the exercise training studies are presented (p-values from two-sided moderated t-statistic, no adjustment).

**Supplementary Table 5: TaqMan primers (Thermo Fisher Scientific) used for miRNA real-time qPCR.**

| <b>miRNA</b>    | <b>TaqMan Advanced miRNA Primer<br/>Assay ID</b> |
|-----------------|--------------------------------------------------|
| hsa-miR-1-3p    | 477820_mir                                       |
| hsa-miR-1-5p    | 478726_mir                                       |
| hsa-miR-16-5p   | 477860_mir                                       |
| hsa-miR-19b-3p  | 478264_mir                                       |
| hsa-miR-21-5p   | 477973_mir                                       |
| hsa-miR-22-5p   | 477987_mir                                       |
| hsa-miR-24-3p   | 477992_mir                                       |
| hsa-miR-29a-3p  | 478587_mir                                       |
| hsa-miR-29b-3p  | 478369_mir                                       |
| hsa-miR-29c-3p  | 479229_mir                                       |
| hsa-miR-30b-5p  | 478007_mir                                       |
| hsa-miR-30e-5p  | 479235_mir                                       |
| hsa-miR-103a-3p | 478253_mir                                       |
| hsa-miR-107     | 478254_mir                                       |
| hsa-miR-125b-5p | 477885_mir                                       |
| hsa-miR-126-5p  | 477888_mir                                       |
| hsa-miR-133a-3p | 478511_mir                                       |
| hsa-miR-133a-5p | 478706_mir                                       |
| hsa-miR-133b    | 480871_mir                                       |
| hsa-miR-143-3p  | 477912_mir                                       |
| hsa-miR-181a-5p | 477857_mir                                       |
| hsa-miR-186-5p  | 477940_mir                                       |
| hsa-miR-191-5p  | 477952_mir                                       |
| hsa-miR-195-5p  | 477957_mir                                       |
| hsa-miR-206     | 477968_mir                                       |
| hsa-miR-223-3p  | 477983_mir                                       |
| hsa-miR-320a    | 478594_mir                                       |
| hsa-miR-378a-3p | 478349_mir                                       |
| hsa-miR-378c    | 478864_mir                                       |
| hsa-miR-451a    | 478107_mir                                       |
| hsa-miR-486-5p  | 478128_mir                                       |

**Supplementary Table 6: Primers used for real-time qPCR.**

| <b>Target Gene</b>     | <b>Forward Primer Sequence</b> | <b>Reverse Primer Sequence</b> |
|------------------------|--------------------------------|--------------------------------|
| <b>Human sequences</b> |                                |                                |
| <i>CLIP4</i>           | ATGTCACTGGCAAGGCAATG           | TCATCCAGTTCAATGCCAGC           |
| <i>DES</i>             | CTGGAGCGCAGAATTGAATC           | GGCAGTGAGGTCTGGCTTAG           |
| <i>GUSB</i>            | CAGAGCGAGTATGGAGCAGA           | ACTCTCGTCGGTGACTGTTC           |
| <i>HBP1</i>            | GACACCCCGATGCCATTAAT           | CCACAAGACAAAGATGCACGA          |
| <i>KIF13A</i>          | AAGACTGTCTCCGATGGGC            | GAACAAAGACGCCAAGCTGT           |
| <i>MAPK6</i>           | CATTGACATGTGGGCTGCAG           | GCTCCTGACGATCTTCCTCA           |
| <i>MYF5</i>            | CCACCTCCAAGTCTCTGAT            | GCAATCCAAGCTGGATAAGG           |
| <i>MYOG</i>            | GCTCAGCTCCCTCAACCA             | GCTGTGAGAGCTGCATTCG            |
| <i>PTEN</i>            | TCTGCCATCTCTCTCCTCCT           | CGCCTTCAAGTCTTTCTGCA           |
| <i>RNF11</i>           | TTCACGAGTCTCAGTCCGAC           | GTGTTGGGTGGTAGACTGGA           |
| <i>TBP</i>             | AACAACAGCCTGCCACCTTA           | GCCATAAGGCATCATTGGAC           |
| <i>VPS37A</i>          | TGCCACTGTAGAAGAGCCAA           | TCCCATTCCTCTCTTGGCAG           |
| <i>ZBTB4</i>           | GAAGTACCCCTGCCGCTATT           | GCTGGTGGGTCTTCAGGTTA           |
| <i>ZDHHC7</i>          | TCCTGAAGAAACGGCACAAA           | AGCCAGGAGAGGATGATGC            |
| <b>Mouse sequences</b> |                                |                                |
| <i>Clip4</i>           | AGTTGCTCTCCGAGATATGGA          | TCTGAAAGCGTATCCAGGGA           |
| <i>Des</i>             | ATGGCCTTGGATGTGGAGAT           | GGCTGGTTTCTCGGAAGTTG           |
| <i>Hbb_bs</i>          | TGAGCTCCACTGTGACAAGC           | GTGAAATCCTTGCCCAGGT            |
| <i>Hbp1</i>            | TGGACACCCTGATGCCATTA           | CACAAGACAGAGATGCACGG           |
| <i>Kif13a</i>          | GACATCACTCTCACGCCAA            | CCCCATAAGATCCTGTTCGCC          |
| <i>Mapk6</i>           | CACATGAACTTGAACAGATGCAG        | CAGTGCTTCTCGGCTGATCC           |
| <i>Myf5</i>            | TGAGGGAACAGGTGGAGAAC           | TGTTCTTTCGGGACCAGACA           |
| <i>Myog</i>            | CCAGTGAATGCAACTCCCAC           | AGATTGTGGGCGTCTGTAGG           |
| <i>Pten</i>            | ACAAAGACAAGGCCAACCGAT          | TGAACTGCTAGCCTCTGGAT           |
| <i>Rnf11</i>           | GGCCTTATACAGCATCTGCCT          | CATGCACGGCAGAAATCGAA           |
| <i>Tbp</i>             | CCTTGTACCCTTCACCAATGAC         | ACAGCCAAGATTCACGGTAGA          |

|               |                           |                       |
|---------------|---------------------------|-----------------------|
| <i>Vps37a</i> | ATCCTCCAGTTTTAGCTCCTACTTC | AGCTTCTGGTGGAGGATATGG |
| <i>Zbtb4</i>  | CTGTGAGAAGGTGTTTGCCC      | TCGCTGGTGGGTCTTCAG    |
| <i>Zdhc7</i>  | CAAGTGCTCCCATGATGCTT      | GAGGACGAAGAGGATGCTGA  |

---

**Supplementary Table 7: Antibodies used.**

| <b>TARGET</b>                                               | <b>SOURCE</b>       | <b>IDENTIFIER</b> | <b>DILUTION</b> |
|-------------------------------------------------------------|---------------------|-------------------|-----------------|
| Acetyl-CoA Carboxylase                                      | Cell Signaling      | 3676              | 1/1000          |
| Phospho-Acetyl-CoA Carboxylase (Ser79)                      | Cell Signaling      | 3661              | 1/1000          |
| Akt                                                         | Cell Signaling      | 9272              | 1/1000          |
| Phospho-Akt (Ser473)                                        | Cell Signaling      | 9271              | 1/1000          |
| Phospho-Akt (Thr308)                                        | Cell Signaling      | 4056              | 1/1000          |
| AMPK $\alpha$ ( $\alpha$ 1 and $\alpha$ 2)                  | Cell Signaling      | 2532              | 1/1000          |
| AMPK $\alpha$ (Thr172)                                      | Cell Signaling      | 2531              | 1/1000          |
| AS160                                                       | Abcam               | ab24469           | 1/1000          |
| Phospho-AS160 (Ser588)                                      | Cell Signaling      | 8730              | 1/1000          |
| Phospho-AS160 (Thr642)                                      | Cell Signaling      | 8881              | 1/1000          |
| $\beta$ -actin                                              | Sigma               | A5441             | 1/5000          |
| $\beta$ -Tubulin                                            | Cell Signaling      | 2128              | 1/1000          |
| GLUT4                                                       | Millipore           | 07-1404           | 1/1000          |
| Glycogen Synthase                                           | Cell Signaling      | 3893              | 1/1000          |
| Phospho-Glycogen Synthase (Ser641)                          | Cell Signaling      | 3891              | 1/1000          |
| Glycogen synthase kinase 3 $\alpha/\beta$                   | Cell Signaling      | 5676              | 1/1000          |
| Phospho-Glycogen synthase kinase 3 $\alpha/\beta$ (Ser21/9) | Cell Signaling      | 9331              | 1/1000          |
| MYH1/2                                                      | Santa Cruz Biotech. | sc-53088          | 1/500           |
| Total OXPHOS Rodent WB Antibody Cocktail                    | Abcam               | ab110413          | 1/1000          |
| TBC1D1                                                      | Cell Signaling      | 4629              | 1/1000          |
| Phospho-TBC1D1 (Ser237 or Ser231)                           | Millipore           | 07-2268           | 1/1000          |
| Phospho-TBC1D1 (Ser700)                                     | Cell Signaling      | 6929              | 1/1000          |
